# Supplementary material for: Dansyl-based fluorescent chemosensors for selective responses of Cr(iii)
Source: Royal Society of Chemistry journal article supplement (doi:10.1039/b815207a), 2008-12-16
Supplement: b815207a.pdf [file b815207a.pdf]

## Supporting Materials

### **Dansyl-based fluorescent chemosensors for selective responses of Cr(III)**

*Hongmei Wu, Peng Zhou,\* Jian Wang, Liang Zhao and Chunying Duan\**

State Key Laboratory of Fine Chemicals, Dalian University of Technology Dalian,  
116012, China. E-mail: [cyduan@dlut.edu.cn](mailto:cyduan@dlut.edu.cn)

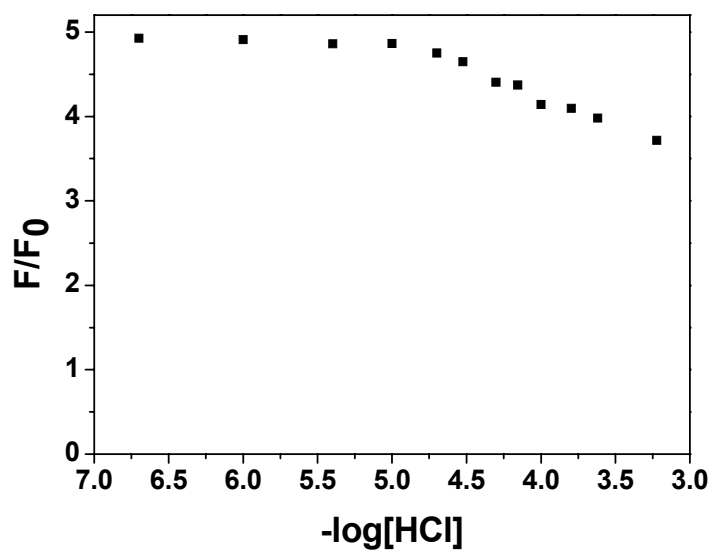

**Figure S1** The fluorescence intensity of the **DN1** (20  $\mu\text{M}$ ) in the presence of  $\text{Cr}^{3+}$  (100  $\mu\text{M}$ ), upon the addition of HCl. The emission intensities were integrated at 545 nm (excitation at 350 nm)

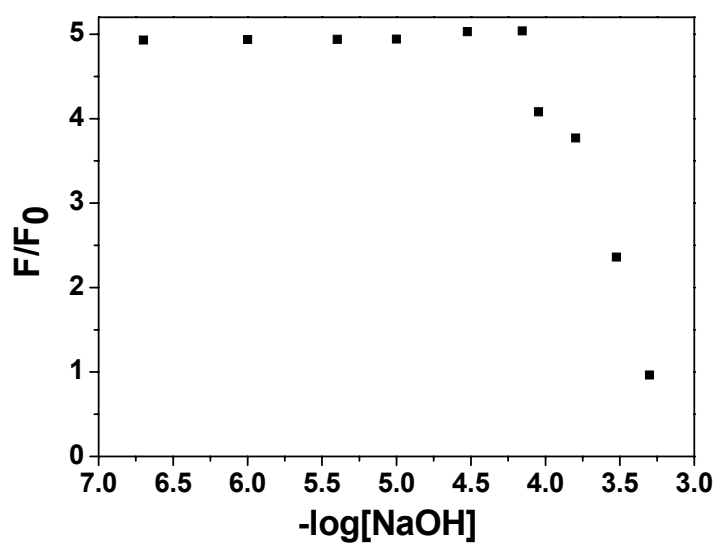

**Figure S2** The fluorescence intensity of the **DN1** (20  $\mu\text{M}$ ) in the presence of  $\text{Cr}^{3+}$  (100  $\mu\text{M}$ ), upon the addition of NaOH. The emission intensities were integrated at 545 nm (excitation at 350 nm)

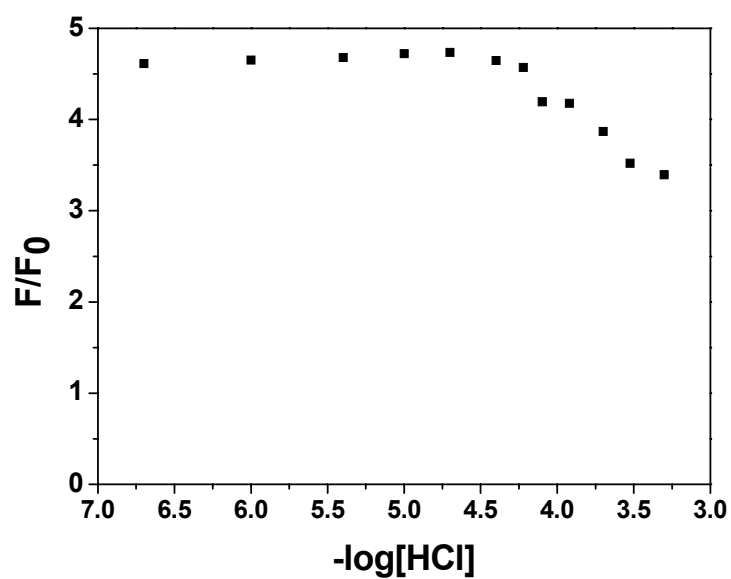

**Figure S3** The fluorescence responses of the **DN2** (20  $\mu\text{M}$ ) in the presence of  $\text{Cr}^{3+}$  (100  $\mu\text{M}$ ), upon the addition of HCl. The emission intensities were integrated at 540 nm (excitation at 360 nm)

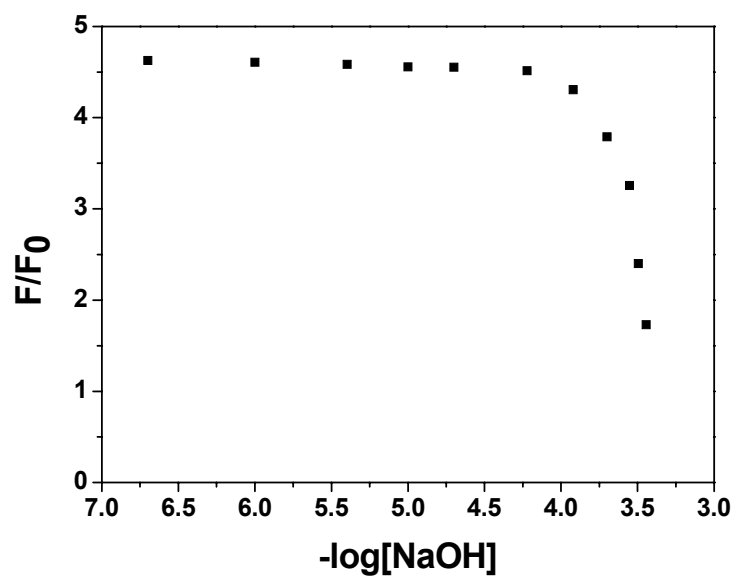

**Figure S4** The fluorescence responses of the **DN2** (20  $\mu\text{M}$ ) in the presence of  $\text{Cr}^{3+}$  (100  $\mu\text{M}$ ), upon the addition of NaOH. The emission intensities were integrated at 540 nm (excitation at 360 nm)

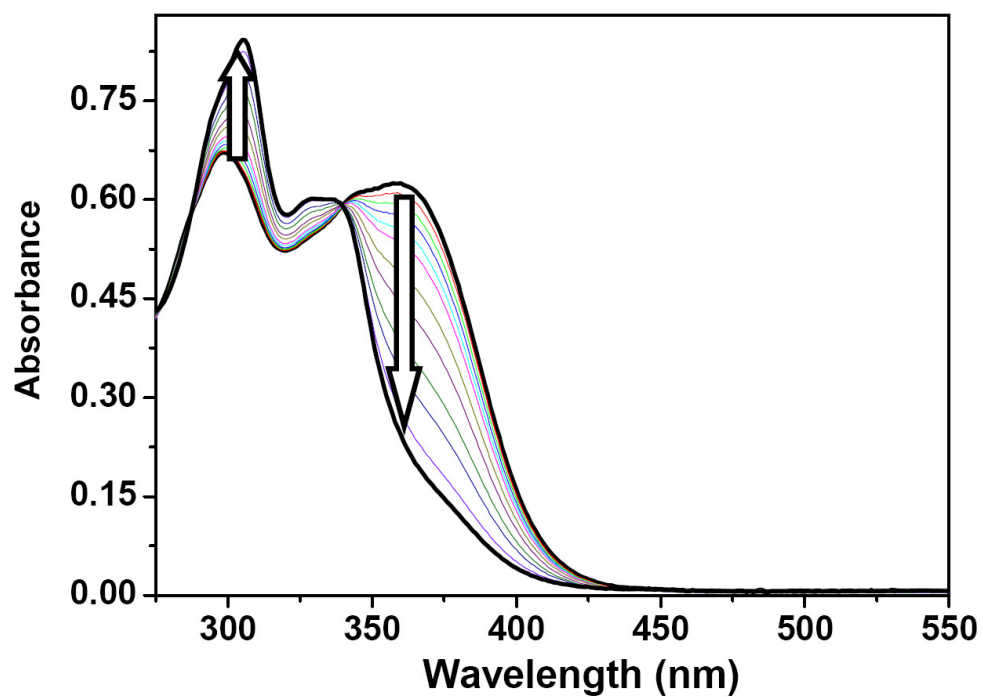

**Figure S5** Absorption spectra of **DN2** (20 μM), upon addition of increasing amount of Cr<sup>3+</sup> (0 to 0.2 mM) in the DMF/H<sub>2</sub>O (9:1) solution.

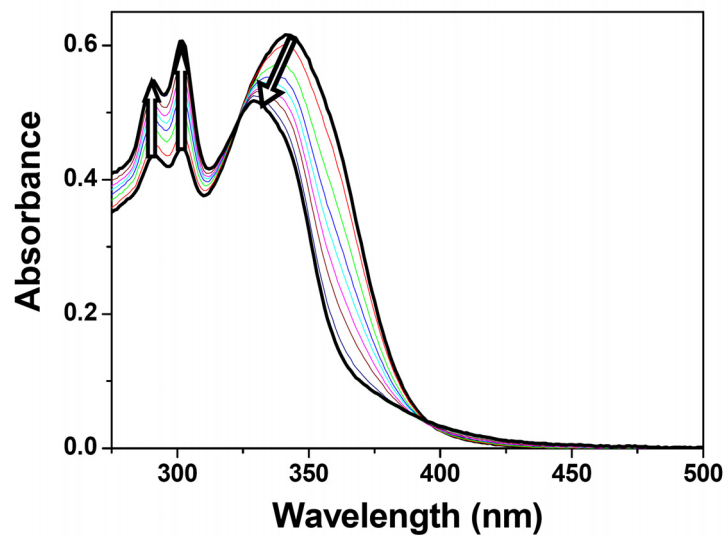

**Figure S6** Absorption spectra of DN3 (20 μM), upon addition of increasing amount of Cr<sup>3+</sup> (0 to 0.2 mM) in the DMF/H<sub>2</sub>O (9:1) solution.
